# Supplementary material
Source: Springer Nature journal article supplement (https://www.springermedizin.de/resource/supplementary/12936_2010_1301_MOESM2_ESM.pdf/9549444)

## Plasma groups

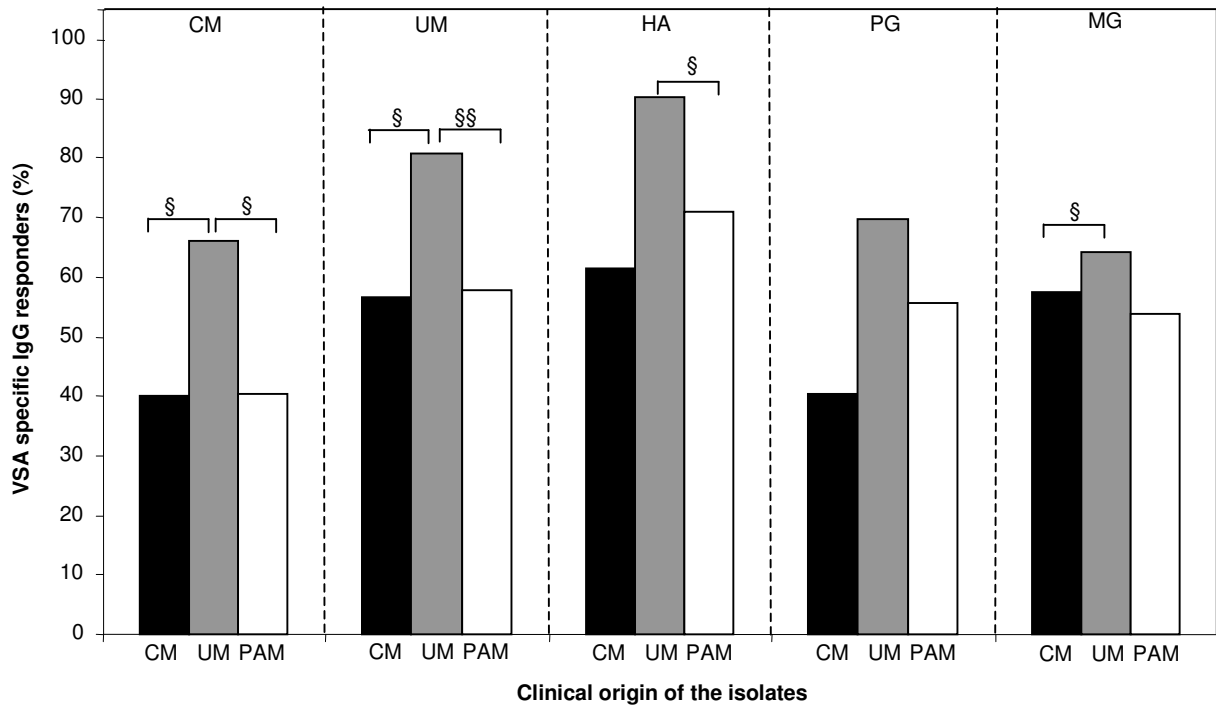

Supplement: MOESM2 [file 9549444]
